# Supplementary material
Source: Springer Nature journal article supplement (https://www.springermedizin.de/resource/supplementary/12883_2013_976_MOESM1_ESM.pdf/9456540)

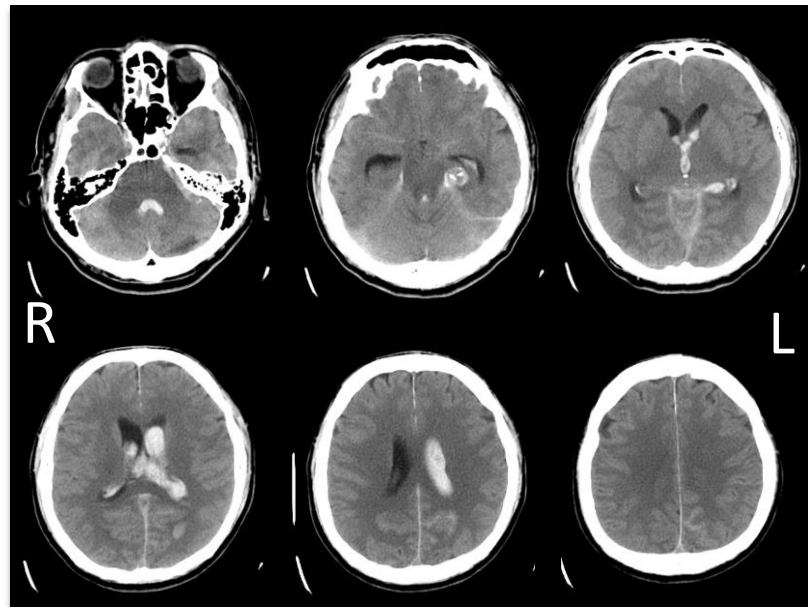

A

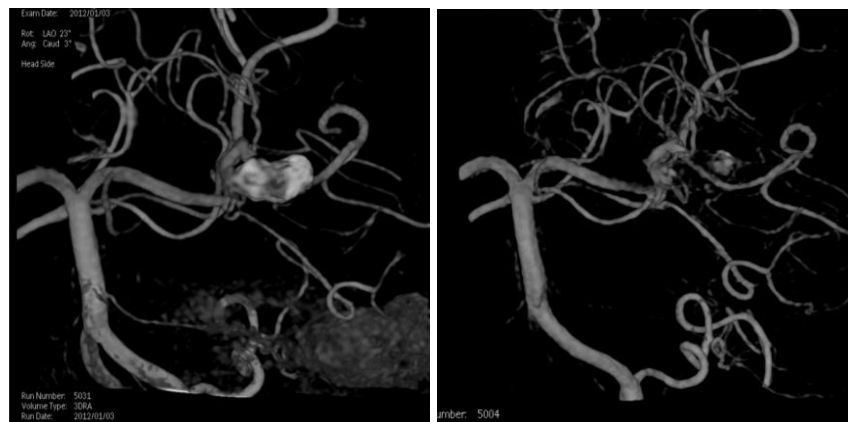

B

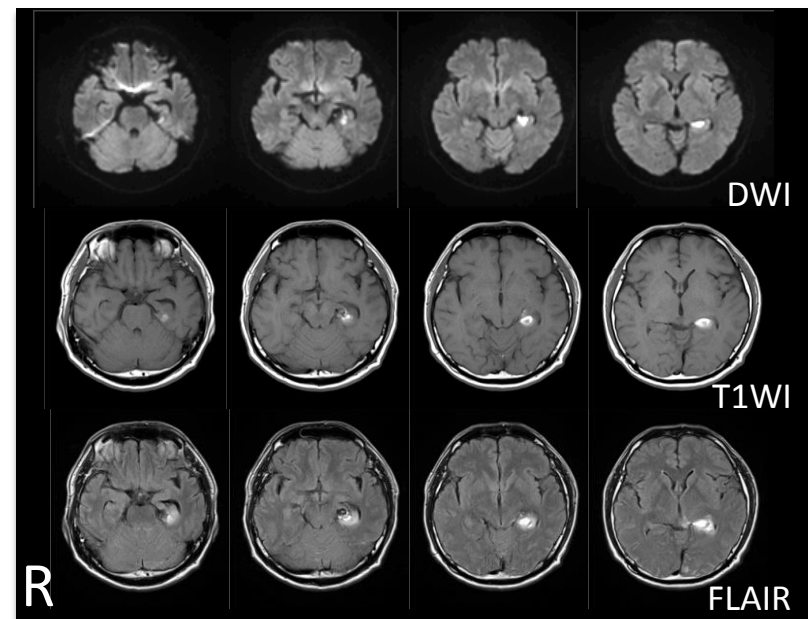

C

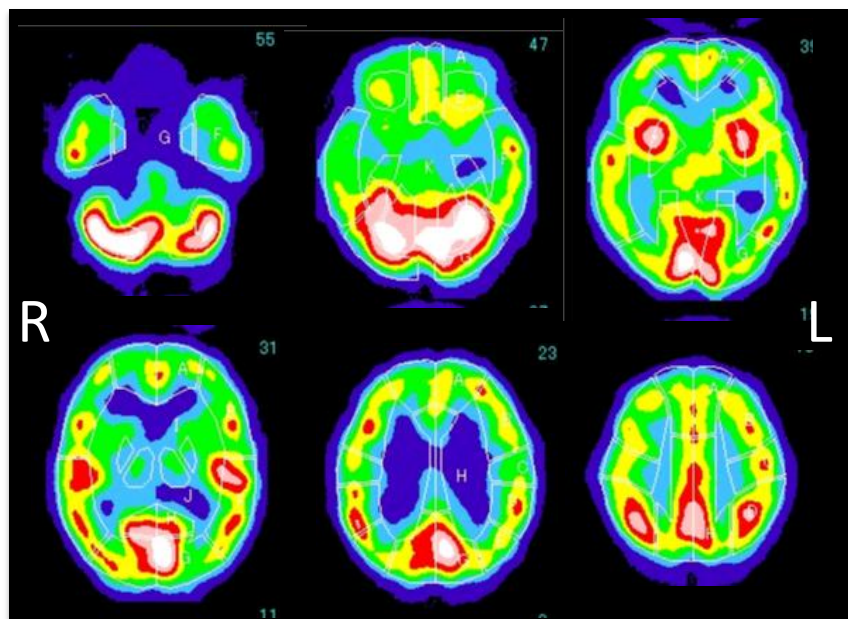

D

Supplement: MOESM1 [file 9456540]
